# Supplementary material for: Development of multi-residue gas chromatography coupled with mass spectrometry methodologies for the measurement of 15 chemically different disinfection by-products (DBPs) of emerging concern in drinking water from two different Portuguese water treatment plants
Source: Royal Society of Chemistry journal article supplement (doi:10.1039/d2ay01401g), 2022-01-01

## Supplementary Information

**Fig. S1.** General representation of the different two sampling points.

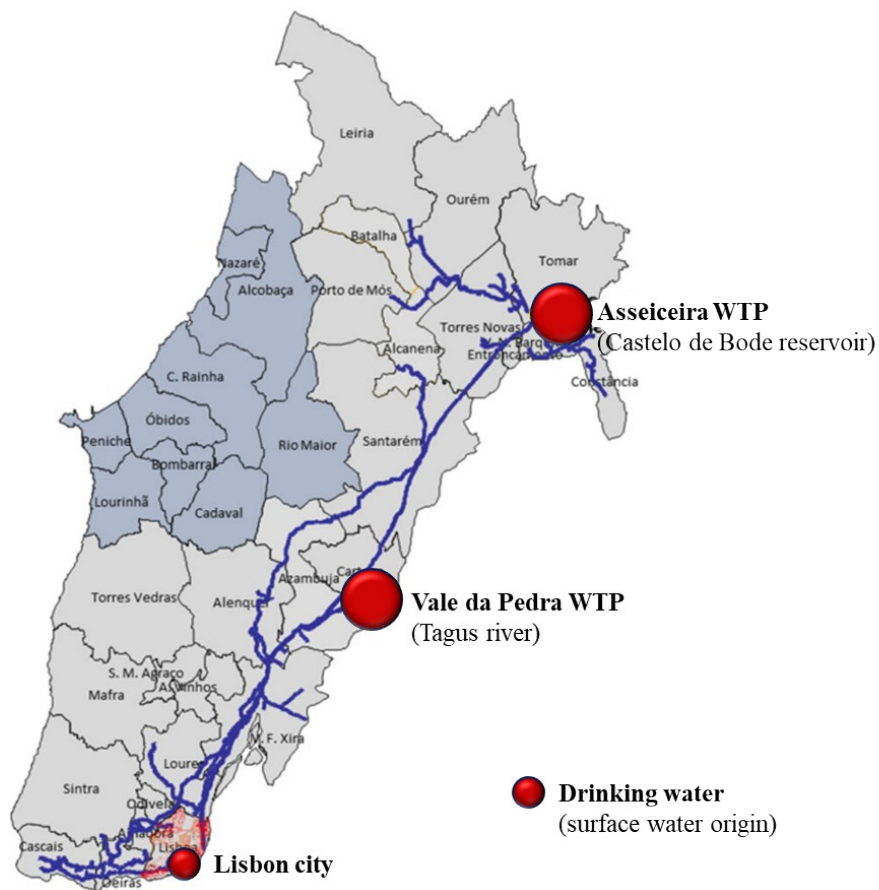

**Fig. S2.** Comparison of PDMS/DVB (adsorption temperature 40°C, extraction time 20 min) and DVB/CAR/PDMS (Adsorption temperature 40°C, extraction time 20 min) fibers performance, attending to the 10 target DBPs analyzed by SPME-GC-MS.

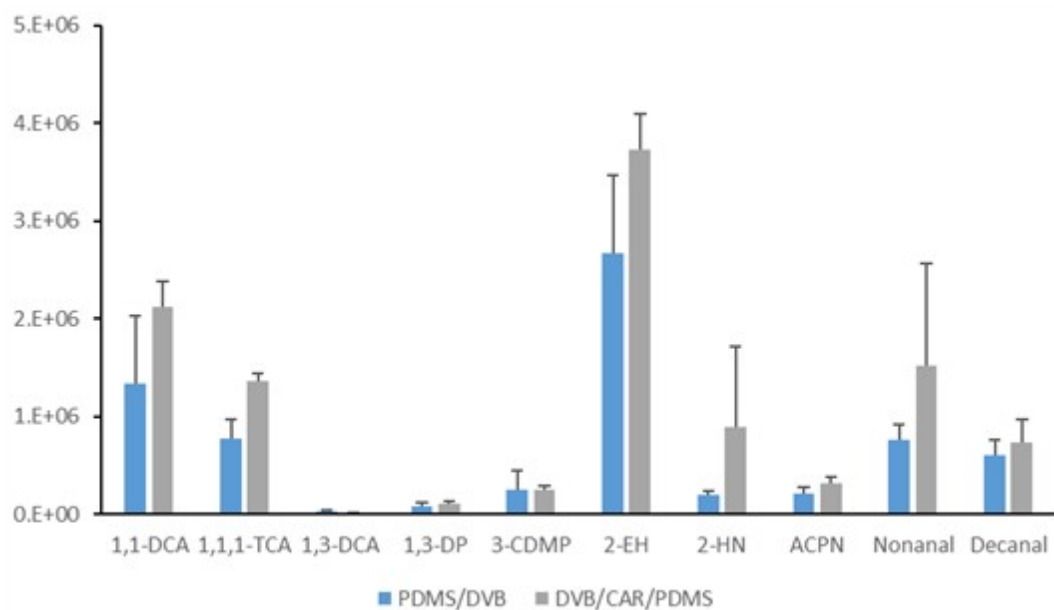

Supplement: d2ay01401g1.pdf [file d2ay01401g1.pdf]
